# Supplementary material for: Improving Access to Mental Health Care by Delivering Psychotherapeutic Care in the Workplace: A Cross-Sectional Exploratory Trial
Source: PubMed Central journal article supplement (PMC5215922; doi:10.1371/journal.pone.0169559), 2017-01-05
Supplement: pone.0169559.s002.pdf [file pone.0169559.s002.pdf]

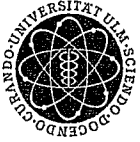

Universität Ulm • Ethikkommission • 89069 Ulm

Herrn  
Prof. Dr. Harald Gündel  
Klinik für Psychosomatische Medizin  
und Psychotherapie  
Am Hochsträß 8  
89081 Ulm

Vorsitz: Prof. Dr. U.B. Brückner

Geschäftsstelle: Iris Seitz

Hausadresse:  
Helmholtzstraße 20 (Oberer Eselsberg)  
89081 Ulm  
Telefon: +49 - (0)731 - 500-22052  
Telefax: +49 - (0)731 - 500-22036  
Email: ethik-kommission@uni-ulm.de  
<http://www.uni-ulm.de/ethikkommission/>

Unser Zeichen  
224/11 – UBB/se.

Durchwahl  
22052

Datum  
26.09.2011

n/an die Mitglieder der Ethikkommission der Universität Ulm

**Antrag Nr. 224/11 – Die Psychosomatische Sprechstunde im Betrieb – ein neues Versorgungsmodell an der Schnittstelle zwischen betriebsärztlicher Betreuung und Konsiliarpsychosomatik**

Sehr geehrter Herr Prof. Gündel,

am 05.09.2011 wurde Ihr o.g. Antrag mündlich verhandelt.

Nach Eingang der gewünschten Ergänzungen und Korrekturen am 23.09.2011 sind alle Voraussetzungen erfüllt.

Es bestehen keine ethisch begründbaren Bedenken gegen die Durchführung des Projekts.

**Damit wird die Bewertung durch die Ethikkommission der Universität Ulm mit einer zustimmenden Stellungnahme abgeschlossen.**

Entsprechend der ausschließlich beratenden Funktion der Ethikkommission betrifft diese Bewertung nur die *berufsethische und berufsrechtliche Beurteilung* der Konzeption, der geplanten Methoden, der Durchführung und Überwachung des betreffenden Projekts sowie der beabsichtigten Patientenaufklärung.

**Die ärztliche und juristische Verantwortung verbleibt uneingeschränkt beim Projektleiter und den daran Mitwirkenden.**

- Bitte teilen Sie uns jede Änderung in der Konzeption des Projekts mit. Es muss dann geklärt werden, ob die Beurteilung der Ethikkommission noch Bestand hat.
- Über alle schwerwiegenden oder unerwarteten unerwünschten Ereignisse, die während der Untersuchung auftreten und die Sicherheit der Studienteilnehmer oder die Durchführung des Projekts beeinträchtigen könnten, muss der Vorsitzende der Ethikkommission unterrichtet werden.
- Die Ethikkommission der Universität Ulm geht davon aus, dass nicht-ärztliche Mitarbeiter speziell auf Verschwiegenheit verpflichtet werden.
- Außerdem benötigt die Ethikkommission eine zeitnahe Nachricht über den Abschluss des Projekts und einen Bericht mit Mitteilung der gewonnenen Erkenntnisse.

Für die Ethikkommission der Universität Ulm

Prof. Dr. U. B. Brückner  
Vorsitzender
