# Supplementary material for: Improving Access to Mental Health Care by Delivering Psychotherapeutic Care in the Workplace: A Cross-Sectional Exploratory Trial
Source: PubMed Central journal article supplement (PMC5215922; doi:10.1371/journal.pone.0169559), 2017-01-05
Supplement: pone.0169559.s004.pdf [file pone.0169559.s004.pdf]

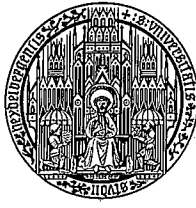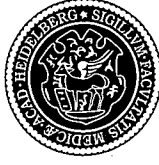

**UniversitätsKlinikum Heidelberg**  
Koordierungsstelle Versorgungsforschung Baden-Württemberg  
Abteilung Allgemeinmedizin u. Versorgungsforschung  
Voßstr. 2, Geb. 37  
D-69115 Heidelberg

Eva Rothermund  
Universität Ulm  
Klinik für Psychosomatische Medizin und Psychotherapie  
Am Hochsträss 8  
89081 Ulm

Koordinierungsstelle Versorgungsforschung Baden-Württemberg

PD. Dr. Gunter Laux  
Abteilung Allgemeinmedizin  
und Versorgungsforschung  
Voßstraße 2, Geb. 37  
D-69115 Heidelberg  
Fon +49 (0)6221 56 6207  
Fax +49 (0)6221 56 1972  
g.laux@med.uni-heidelberg.de

Heidelberg, 9.9.2011

## Ihre Förderung im Rahmen der Nachwuchsakademie Versorgungsforschung Baden-Württemberg

Sehr geehrte Frau Rothermund,

wir freuen uns sehr, dass Sie mit Ihrem Forschungsprojekt die erforderlichen Bedingungen zur Förderung im Rahmen der Nachwuchsakademie Versorgungsforschung Baden-Württemberg erfüllt haben. Sämtliche Informationen bzgl. Ihrer Förderung finden Sie anbei.

Bitte teilen Sie uns noch folgende Informationen mit, die für eine Mittelzuweisung notwendig sind:

Angabe eines deutschen **Bankkontos**, auf das die Mittel an Ihr Forschungsinstitut überwiesen werden, mit Angabe von

- Name des Kreditinstituts
- Bankleitzahl
- Kontonummer

und

sofern vorhanden, die Angabe der **Kostenstelle**, über die Ihr Forschungsprojekt geführt wird. Diese Kostenstelle erscheint als Verwendungszweck bei den jeweiligen Überweisungen.

Bitte senden Sie diese Angaben per Email an den Kostenstellenverantwortlichen unserer Abteilung, Herrn Andreas Gutscher, der Ihre Angaben diskret behandeln wird.

Email-Adresse: andreas.gutscher@med.uni-heidelberg.de

Mit freundlichen Grüßen,

Heidelberg, den 9.9.2011

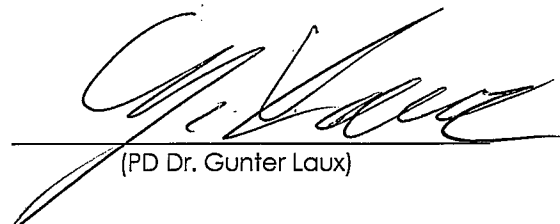

(PD Dr. Gunter Laux)
